# Supplementary material for: Removal of cationic and anionic heavy metals from water by 1D and 2D-carbon structures decorated with magnetic nanoparticles
Source: PubMed Central journal article supplement (PMC5658355; doi:10.1038/s41598-017-14461-2), 2017-10-26
Supplement: 41598_2017_14461_MOESM1_ESM.pdf [file 41598_2017_14461_MOESM1_ESM.pdf]

# Removal of cationic and anionic heavy metals from water by 1D and 2D-carbon structures decorated with magnetic nanoparticles

Chella Santhosh <sup>a,\*</sup>, Ravi Nivetha <sup>b</sup>, Pratap Kollu <sup>c,d</sup>, Varsha Srivastava <sup>e</sup>, Mika Sillanpää <sup>e</sup>,

Andrews Nirmala Grace <sup>b,\*</sup>, Amit Bhatnagar <sup>a,\*</sup>

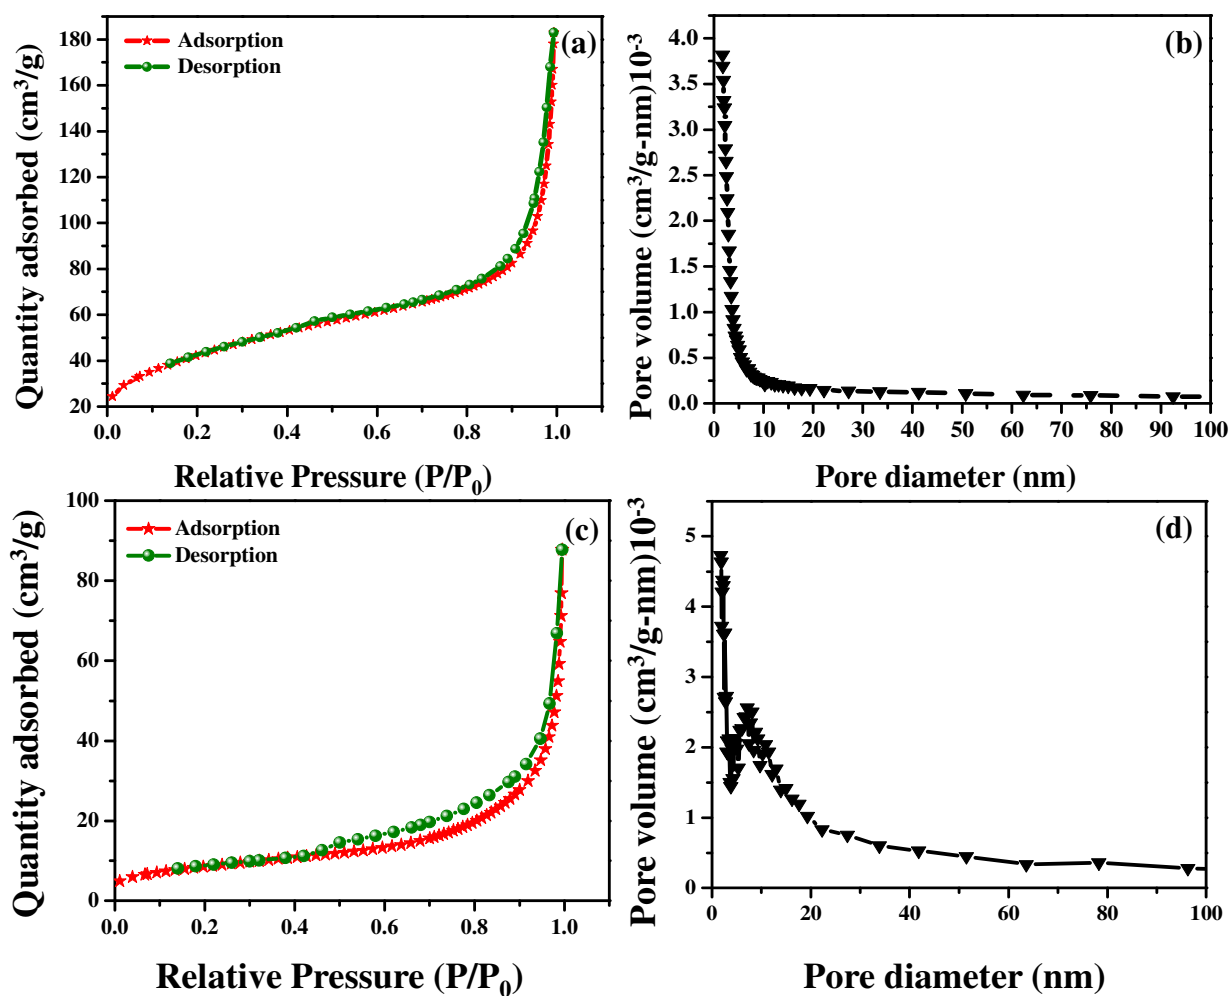

**Supplementary Fig. S1.** (a, c) N<sub>2</sub> adsorption – desorption isotherm and (b, d) Pore size distribution of PG-C and CNF-C nanocomposites.

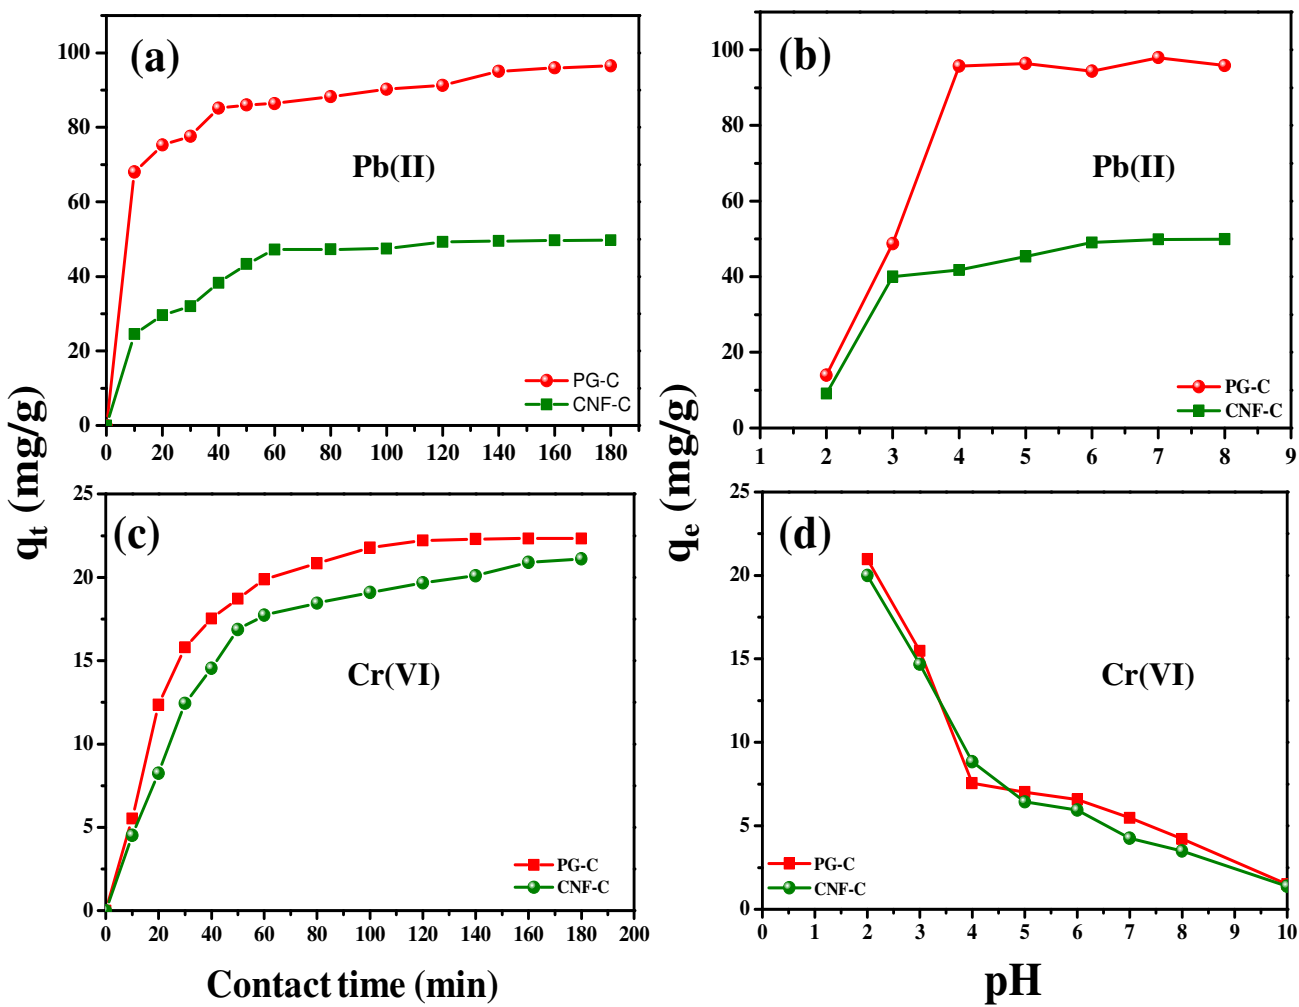

**Supplementary Fig. S2.** Effect of (a, c) contact time and (b, d) pH of Pb(II) and Cr(VI) ions adsorption by PG-C and CNF-C nanocomposites.

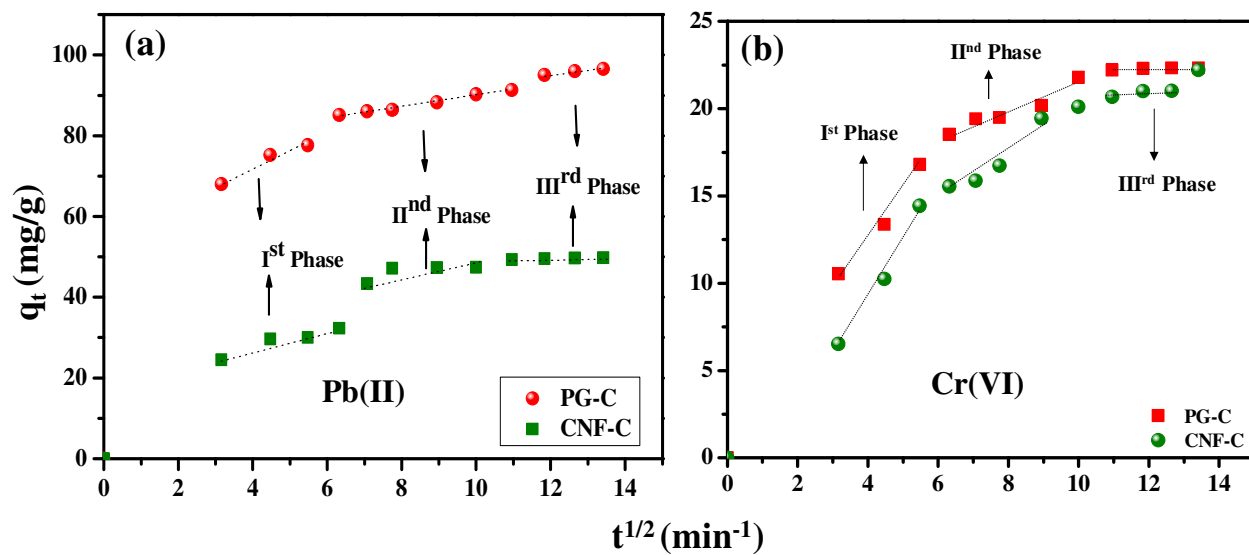

**Supplementary Fig. S3.** Intra-particle diffusion model for (a) Pb(II) and (b) Cr(VI) ions adsorption by PG-C and CNF-C nanocomposites.

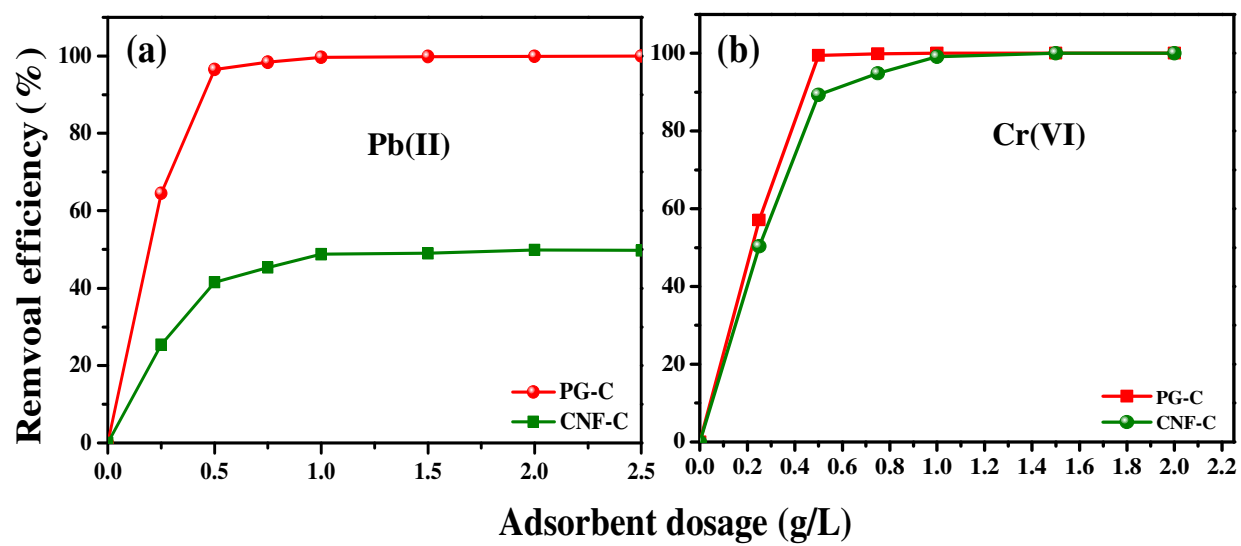

**Supplementary Fig. S4.** Effect of adsorbent dosage on (a) Pb(II) and (b) Cr(VI) ions adsorption by PG-C and CNF-C nanocomposites.

**Supplementary Table S1:** Kinetic parameters for Pb(II) and Cr(VI) ions adsorption onto synthesized nanocomposites.

| Adsorbate | Adsorbent | <i>Pseudo-second-order model</i>          |                            |                                           |                                           |                |                |
|-----------|-----------|-------------------------------------------|----------------------------|-------------------------------------------|-------------------------------------------|----------------|----------------|
|           |           | $q_{e(\text{exp})}$ (mg g <sup>-1</sup> ) | $k_2$ (min <sup>-1</sup> ) | $q_{e(\text{cal})}$ (mg g <sup>-1</sup> ) | RMSE                                      | R <sup>2</sup> |                |
| Pb(II)    | PG-C      | 96.54                                     | 0.002                      | 95.85                                     | 2.25                                      | 0.998          |                |
|           | CNF-C     | 49.76                                     | 0.001                      | 55.78                                     | 2.71                                      | 0.992          |                |
| Cr(VI)    | PG-C      | 22.33                                     | 0.004                      | 23.97                                     | 6.03                                      | 0.990          |                |
|           | CNF-C     | 21.11                                     | 0.002                      | 22.34                                     | 5.62                                      | 0.991          |                |
| Adsorbate | Adsorbent | <i>Avrami model</i>                       |                            |                                           |                                           |                |                |
|           |           | $q_{e(\text{exp})}$ (mg g <sup>-1</sup> ) | $K_{\text{av}}$            | $n_{\text{av}}$                           | $q_{e(\text{cal})}$ (mg g <sup>-1</sup> ) | RMSE           | R <sup>2</sup> |
| Pb(II)    | PG-C      | 96.54                                     | 0.017                      | 6.78                                      | 89.70                                     | 4.57           | 0.994          |
|           | CNF-C     | 49.76                                     | 0.006                      | 6.79                                      | 49.13                                     | 3.16           | 0.989          |
| Cr(VI)    | PG-C      | 22.33                                     | 0.038                      | 1.33                                      | 22.21                                     | 5.99           | 0.986          |
|           | CNF-C     | 21.11                                     | 0.031                      | 1.53                                      | 19.78                                     | 5.26           | 0.832          |
| Adsorbate | Adsorbent | <i>Intra-particle diffusion model</i>     |                            |                                           |                                           |                |                |
|           |           | $C_i$ (mg L <sup>-1</sup> )               | I                          | $K_p$                                     | RMSE                                      | R <sup>2</sup> |                |
| Pb(II)    | PG-C      | 50                                        | 5.24                       | 0.25                                      | 70.98                                     | 0.906          |                |
|           | CNF-C     | 50                                        | 5.24                       | 0.25                                      | 31.72                                     | 0.956          |                |
| Cr(VI)    | PG-C      | 10                                        | 11.32                      | 1.00                                      | 8.86                                      | 0.936          |                |
|           | CNF-C     | 10                                        | 11.32                      | 1.00                                      | 9.13                                      | 0.959          |                |

**Supplementary Table S2:** Isotherm studies for Pb(II) and Cr(VI) ions onto the PG-C and CNF-C nanocomposites.

| Adsorbate | Adsorbent | <i>Langmuir isotherm model</i> |       |       |       |       |
|-----------|-----------|--------------------------------|-------|-------|-------|-------|
|           |           | $q_m$ (mg g <sup>-1</sup> )    | $K_L$ | $R_L$ | RMSE  | $R^2$ |
| Pb(II)    | PG-C      | 131.40                         | 2.05  | 0.009 | 14.75 | 0.987 |
|           | CNF-C     | 42.90                          | 7.10  | 0.002 | 5.19  | 0.985 |
| Cr(VI)    | PG-C      | 68.85                          | 2.70  | 0.004 | 7.84  | 0.990 |
|           | CNF-C     | 51.07                          | 3.20  | 0.002 | 5.87  | 0.989 |

| Adsorbate | Adsorbent | <i>Freundlich isotherm model</i>                                 |      |   |       |       |
|-----------|-----------|------------------------------------------------------------------|------|---|-------|-------|
|           |           | $K_F$ (mg g <sup>-1</sup> ) (L mg <sup>-1</sup> ) <sup>1/n</sup> | n    | - | RMSE  | $R^2$ |
| Pb(II)    | PG-C      | 73.91                                                            | 5.53 | - | 19.15 | 0.786 |
|           | CNF-C     | 29.48                                                            | 9.86 | - | 9.80  | 0.510 |
| Cr(VI)    | PG-C      | 33.62                                                            | 5.55 | - | 9.64  | 0.847 |
|           | CNF-C     | 29.73                                                            | 7.43 | - | 7.58  | 0.897 |

| Adsorbate | Adsorbent | <i>Sips isotherm model</i>  |                             |      |       |       |
|-----------|-----------|-----------------------------|-----------------------------|------|-------|-------|
|           |           | $q_m$ (mg g <sup>-1</sup> ) | $K_s$ (L mg <sup>-1</sup> ) | n    | RMSE  | $R^2$ |
| Pb(II)    | PG-C      | 130.51                      | 2.32                        | 1.07 | 15.20 | 0.965 |
|           | CNF-C     | 44.34                       | 5.43                        | 0.85 | 6.42  | 0.976 |
| Cr(VI)    | PG-C      | 136.54                      | 0.34                        | 0.27 | 9.42  | 0.942 |
|           | CNF-C     | 72.22                       | 0.76                        | 0.29 | 5.62  | 0.914 |

| Adsorbate | Adsorbent | <i>Redlich-Peterson isotherm model</i> |       |      |       |       |
|-----------|-----------|----------------------------------------|-------|------|-------|-------|
|           |           | $K_{RP}$ (L mg <sup>-1</sup> )         | a     | n    | RMSE  | $R^2$ |
| Pb(II)    | PG-C      | 238.6                                  | 1.77  | 0.85 | 15.61 | 0.858 |
|           | CNF-C     | 30.99                                  | 1.58  | 1.12 | 6.13  | 0.803 |
| Cr(VI)    | PG-C      | 207.90                                 | 33.00 | 0.81 | 9.35  | 0.887 |
|           | CNF-C     | 107.82                                 | 29.85 | 0.86 | 7.58  | 0.897 |

**Supplementary Table S3:** Thermodynamic parameters for Pb(II) and Cr(VI) ions onto synthesized nanocomposites.

|           |              | <b>Pb(II)</b>                              |                                            |                                                           | <b>Cr(VI)</b>                              |                                            |                                                           |
|-----------|--------------|--------------------------------------------|--------------------------------------------|-----------------------------------------------------------|--------------------------------------------|--------------------------------------------|-----------------------------------------------------------|
| Adsorbent | Temp.<br>(K) | $\Delta G^\circ$<br>(kJmol <sup>-1</sup> ) | $\Delta H^\circ$<br>(kJmol <sup>-1</sup> ) | $\Delta S^\circ$<br>(Jmol <sup>-1</sup> K <sup>-1</sup> ) | $\Delta G^\circ$<br>(kJmol <sup>-1</sup> ) | $\Delta H^\circ$<br>(kJmol <sup>-1</sup> ) | $\Delta S^\circ$<br>(Jmol <sup>-1</sup> K <sup>-1</sup> ) |
| PG-C      | 298          | -9.96                                      |                                            |                                                           | -17.94                                     |                                            |                                                           |
|           | 308          | -9.05                                      | 6.07                                       | 1.19                                                      | -16.16                                     | 15.42                                      | 0.45                                                      |
|           | 318          | -3.02                                      |                                            |                                                           | -14.73                                     |                                            |                                                           |
| CNF-C     | 298          | -13.21                                     |                                            |                                                           | -14.01                                     |                                            |                                                           |
|           | 308          | -10.97                                     | 12.45                                      | 3.65                                                      | -12.31                                     | 27.87                                      | 0.55                                                      |
|           | 318          | -5.76                                      |                                            |                                                           | -8.04                                      |                                            |                                                           |
